# Supplementary material
Source: publisher figshare collection journal article supplement (https://sage.figshare.com/ndownloader/files/13678376)
Supplement: Supplementary file 1 [file 13678376]

**Online Appendices**

Appendix I: The Coding Scheme of the Dependent Variable

The fundamental idea of the coding scheme is that the dependent variable stands for the *probability* of being named as the preferred caregiver or listener. Following this line of thinking, we have several illustrative scenarios. Without loss of generality, suppose a parent has three children, A, B, and C.

*Scenario 1:* If a particular child (e.g., child A) is explicitly named as the *sole* preferred caregiver or listener among all three children, his or her value of the dependent variable would be one, and the other children (B and C) would be zero (Column I of Table A1).

*Scenario 2:* If multiple but not all children (e.g., A and B) are preferred, the dependent variable value for A and B would be 1/2, but that for C is zero. That is because A and B do not differ from each other in the eyes of parents, so their probability of being preferred is one over the total number of preferred children. However, C is not named at all, so his or her probability is zero (Column II of Table A1).

*Scenario 3:* Similarly, if parents assume that anyone of A, B, and C can be a caregiver or listener, the dependent variable for them would be 1/3 (Column IIII of Table A1).

*Scenario 4:* If the parent explicitly states that none of the children are preferred, all children would be valued at zero for the dependent variable (Column IV of Table A1).

Table A1: Multiple Scenarios for the Coding of the Dependent Variable

| Children | I | II | III | IV |
| --- | --- | --- | --- | --- |
|  | Scenario 1 | Scenario 2 | Scenario 3 | Scenario 4 |
| A | 1 | 1/2 | 1/3 | 0 |
| B | 0 | 1/2 | 1/3 | 0 |
| C | 0 | 0 | 1/3 | 0 |

In the CLASS, the descriptive information about the dependent variable can be found in Figure A1, where the values on the x axis are interpreted according to the rule introduced above.

Figure A1: Descriptive Information of the Dependent Variable

Appendix II: Results of the Conditional Fixed-Effect Fractional Logit Model (Adult Children of Surveyed Older Respondents):

Adult Children Born Before the One-Child Policy

|  | preferred caregiver | | | | | | | | preferred listener | | | | | |
| --- | --- | --- | --- | --- | --- | --- | --- | --- | --- | --- | --- | --- | --- | --- |
|  | rural | | | | urban | | | | rural | | | urban | | |
| Economic security | -0.011 | (0.029) | |  | -0.004 | | (0.025) |  | 0.000 | (0.031) |  | 0.011 | (0.026) |  |
| Educational attainment | | | |  |  | |  |  |  |  |  |  |  |  |
| (reference=no formal education) | | | |  |  | |  |  |  |  |  |  |  |  |
| *junior high school or below* | 0.177 | (0.070) | | * | 0.087 | | (0.081) |  | 0.166 | (0.073) | * | 0.087 | (0.085) |  |
| *senior high school and above* | 0.165 | (0.079) | | * | 0.147 | | (0.082) |  | 0.156 | (0.081) |  | 0.165 | (0.088) |  |
| Job status (being employed) | -0.131 | (0.047) | | ** | -0.002 | | (0.041) |  | -0.144 | (0.048) | ** | -0.014 | (0.042) |  |
| Marital status (being married) | -0.474 | (0.051) | | *** | -0.456 | | (0.044) | *** | -0.424 | (0.053) | *** | -0.407 | (0.045) | *** |
| Children less than 18 | 0.165 | (0.038) | | *** | 0.091 | | (0.034) | ** | 0.177 | (0.040) | *** | 0.062 | (0.035) |  |
| Coresidence | 0.193 | (0.065) | | ** | 0.088 | | (0.054) |  | 0.145 | (0.066) | * | 0.043 | (0.056) |  |
| Apartment owned by parents | 0.169 | (0.089) | |  | 0.092 | | (0.073) |  | 0.130 | (0.093) |  | 0.020 | (0.076) |  |
| Receiving support for grandchildren care | 0.023 | (0.011) | | * | 0.017 | | (0.010) |  | 0.015 | (0.013) |  | 0.014 | (0.010) |  |
| Receiving monetary support | 0.020 | (0.015) | |  | 0.015 | | (0.009) |  | 0.015 | (0.015) |  | 0.011 | (0.009) |  |
| Receiving household chore support | 0.030 | (0.017) | |  | 0.006 | | (0.014) |  | 0.016 | (0.018) |  | 0.011 | (0.014) |  |
| Providing monetary support | 0.028 | (0.010) | | ** | 0.018 | | (0.008) | * | 0.037 | (0.011) | *** | 0.019 | (0.008) | * |
| Providing household chore support | 0.044 | (0.016) | | ** | 0.018 | | (0.013) |  | 0.050 | (0.016) | ** | 0.034 | (0.014) | * |
| Frequency of meeting each other | 0.013 | (0.018) | |  | 0.048 | | (0.015) | ** | 0.026 | (0.019) |  | 0.041 | (0.016) | ** |
| Frequency of calling each other | 0.032 | (0.012) | | ** | 0.024 | | (0.009) | ** | 0.042 | (0.012) | *** | 0.023 | (0.009) | * |
| Gender(female) | -0.059 | (0.037) | |  | -0.012 | | (0.032) |  | -0.003 | (0.039) |  | 0.058 | (0.033) |  |
| Birth order (first) | 0.473 | (0.045) | | *** | 0.523 | | (0.040) | *** | 0.550 | (0.047) | *** | 0.584 | (0.042) | *** |
| Birth order (last) | 0.192 | (0.041) | | *** | 0.238 | | (0.034) | *** | 0.188 | (0.043) | *** | 0.239 | (0.036) | *** |
| ID of parents | √ |  | |  | √ | |  |  | √ |  |  | √ |  |  |
| Intercept | -1.312 | (0.110) | | *** | -1.207 | | (0.105) | *** | -1.550 | (0.117) | *** | -1.441 | (0.109) | *** |
| Log Likelihood | -2740.497 |  | | *** | -2916.281 | |  | *** | -2664.678 |  | *** | -2865.840 |  | *** |
| N | 6101 |  | |  | 6342 | |  |  | 5992 |  |  | 6284 |  |  |
| * p<0.05 ** p<0.01 *** p<0.001 (two-tailed test) | | | | | |
| standard errors in parentheses | | |
| Data source: CLASS | | |

Appendix III: Results of the Conditional Fractional Logit Model (Adult Children of Surveyed Older Respondents): No Fixed-Effect Terms

|  | preferred caregiver | | | | | | | | preferred listener | | | | | |
| --- | --- | --- | --- | --- | --- | --- | --- | --- | --- | --- | --- | --- | --- | --- |
|  | rural | | | | urban | | | | rural | | | urban | | |
| Economic security | -0.014 | (0.028) | |  | 0.001 | | (0.024) |  | -0.004 | (0.029) |  | 0.017 | (0.025) |  |
| Educational attainment | |  | |  |  | |  |  |  |  |  |  |  |  |
| (reference=no formal education) | | | |  |  | |  |  |  |  |  |  |  |  |
| *junior high school or below* | 0.174 | (0.069) | | * | 0.082 | | (0.080) |  | 0.163 | (0.071) | * | 0.085 | (0.084) |  |
| *senior high school and above* | 0.166 | (0.076) | | * | 0.151 | | (0.081) |  | 0.157 | (0.079) | * | 0.168 | (0.087) |  |
| Job status (being employed) | -0.145 | (0.043) | | *** | -0.005 | | (0.039) |  | -0.153 | (0.045) | *** | -0.019 | (0.040) |  |
| Marital status (being married) | -0.444 | (0.048) | | *** | -0.447 | | (0.042) | *** | -0.392 | (0.050) | *** | -0.396 | (0.043) | *** |
| Children less than 18 | 0.169 | (0.037) | | *** | 0.091 | | (0.033) | ** | 0.176 | (0.038) | *** | 0.063 | (0.034) |  |
| Coresidence | 0.205 | (0.063) | | *** | 0.077 | | (0.052) |  | 0.154 | (0.063) | * | 0.033 | (0.054) |  |
| Apartment owned by parents | 0.123 | (0.080) | |  | 0.088 | | (0.067) |  | 0.084 | (0.083) |  | 0.007 | (0.070) |  |
| Receiving support for grandchildren care | 0.024 | (0.011) | | * | 0.019 | | (0.009) | * | 0.016 | (0.012) |  | 0.016 | (0.010) |  |
| Receiving monetary support | 0.017 | (0.014) | |  | 0.016 | | (0.008) |  | 0.006 | (0.014) |  | 0.013 | (0.009) |  |
| Receiving household chore support | 0.029 | (0.016) | |  | 0.009 | | (0.013) |  | 0.018 | (0.017) |  | 0.014 | (0.014) |  |
| Providing monetary support | 0.031 | (0.010) | | ** | 0.019 | | (0.008) | * | 0.038 | (0.010) | *** | 0.020 | (0.008) | * |
| Providing household chore support | 0.043 | (0.015) | | ** | 0.015 | | (0.013) |  | 0.049 | (0.016) | ** | 0.032 | (0.013) | * |
| Frequency of meeting each other | 0.015 | (0.017) | |  | 0.048 | | (0.015) | *** | 0.029 | (0.018) |  | 0.040 | (0.016) | * |
| Frequency of calling each other | 0.034 | (0.011) | | ** | 0.022 | | (0.009) | * | 0.045 | (0.012) | *** | 0.021 | (0.009) | * |
| Gender(female) | -0.069 | (0.036) | |  | -0.017 | | (0.031) |  | 0.001 | (0.038) |  | 0.053 | (0.032) |  |
| Birth order (first) | 0.488 | (0.044) | | *** | 0.545 | | (0.040) | *** | 0.563 | (0.045) | *** | 0.606 | (0.041) | *** |
| Birth order (last) | 0.197 | (0.039) | | *** | 0.255 | | (0.033) | *** | 0.201 | (0.041) | *** | 0.257 | (0.035) | *** |
| Intercept | -1.336 | (0.103) | | *** | -1.275 | | (0.101) | *** | -1.616 | (0.110) | *** | -1.514 | (0.105) | *** |
| Log Likelihood | -3149.748 |  | | *** | -3181.710 | |  | *** | -3073.448 |  | *** | -3132.832 |  | *** |
| N | 18525 |  | |  | 23498 | |  |  | 18297 |  |  | 23016 |  |  |
| * p<0.05 ** p<0.01 *** p<0.001 (two-tailed test) | | | | | |
| standard errors in parentheses | | |
| Data source: CLASS | | |

Table 1: Descriptive Information of Variables

(Adult Children of Surveyed Older Respondents)

| Variable |  | Rural | Urban | Rural-Urban Difference Test |
| --- | --- | --- | --- | --- |
| Apartment owned by parents |  | 4.396% | 5.565% | *** |
| Frequency of received support for grandchildren care | | |  | *** |
| almost none |  | 69.569% | 60.895% |  |
| one time a month |  | 3.320% | 2.680% |  |
| several times a month |  | 3.025% | 3.992% |  |
| at least one time a week |  | 4.448% | 6.254% |  |
| every day (but not all day) |  | 8.486% | 13.129% |  |
| all day |  | 11.152% | 13.050% |  |
| Extent of received monetary support |  |  |  | *** |
| almost none |  | 81.161% | 68.489% |  |
| 1-199 Yuan a |  | 8.281% | 5.963% |  |
| 200-499 Yuan |  | 4.893% | 5.883% |  |
| 500-999 Yuan |  | 2.175% | 4.852% |  |
| 1000-1999 Yuan |  | 1.721% | 6.072% |  |
| 2000-3999 Yuan |  | 0.827% | 3.672% |  |
| 4000-6999 Yuan |  | 0.495% | 1.896% |  |
| 7000-11999 Yuan |  | 0.176% | 1.277% |  |
| over 12000 Yuan |  | 0.271% | 1.896% |  |
| Frequency of received household chore support |  |  |  | *** |
| almost none |  | 80.825% | 76.267% |  |
| several times a year |  | 5.346% | 5.185% |  |
| several times a month |  | 2.065% | 2.607% |  |
| several times a week |  | 2.315% | 3.423% |  |
| almost everyday |  | 9.449% | 12.518% |  |
| Extent of provided monetary support |  |  |  | *** |
| almost none |  | 18.814% | 22.139% |  |
| 1-199 Yuan |  | 12.239% | 5.629% |  |
| 200-499 Yuan |  | 20.702% | 13.094% |  |
| 500-999 Yuan |  | 19.818% | 15.881% |  |
| 1000-1999 Yuan |  | 16.989% | 19.958% |  |
| 2000-3999 Yuan |  | 7.300% | 12.559% |  |
| 4000-6999 Yuan |  | 2.410% | 5.771% |  |
| 7000-11999 Yuan |  | 1.017% | 2.360% |  |
| over 12000 Yuan |  | 0.711% | 2.609% |  |
| Frequency of provided household chore support |  |  |  | *** |
| almost none |  | 42.266% | 40.809% |  |
| several times a year |  | 25.449% | 14.995% |  |
| several times a month |  | 11.088% | 12.345% |  |
| several times a week |  | 8.395% | 16.901% |  |
| almost everyday |  | 12.802% | 14.950% |  |
| Frequency of meeting each other |  |  |  | *** |
| almost none |  | 6.661% | 3.863% |  |
| several times a year |  | 39.299% | 21.140% |  |
| several times a month |  | 15.624% | 17.837% |  |
| several times a week |  | 11.595% | 25.981% |  |
| almost everyday |  | 26.821% | 31.179% |  |
| Frequency of calling each other |  |  |  | *** |
| almost none |  | 12.921% | 8.031% |  |
| several times a year |  | 10.429% | 6.859% |  |
| several times a month |  | 23.051% | 15.934% |  |
| several times a week |  | 19.168% | 27.874% |  |
| almost everyday |  | 4.624% | 13.225% |  |
| Economic security |  |  |  | *** |
| experiencing hardship |  | 21.32% | 13.22% |  |
| can make ends meet |  | 59.779% | 55.614% |  |
| having good status |  | 18.90% | 28.01% |  |
| Educational attainment |  |  |  | *** |
| no formal education |  | 7.957% | 3.293% |  |
| junior high school or below |  | 76.73% | 45.13% |  |
| senior high school and above |  | 15.31% | 51.57% |  |
| Job status (being fulltime employed) |  | 52.381% | 39.262% | *** |
| Marital status (being married) |  | 58.884% | 47.158% | *** |
| Having at least one child less than 18 (yes) |  | 49.011% | 43.679% | *** |
| Coresidence |  | 19.502% | 15.286% | *** |
| Gender(female) |  | 47.379% | 48.623% | * |
| Birth order (first) |  | 19.453% | 19.673% |  |
| Birth order (last) |  | 30.772% | 38.358% | *** |
| Birth before the one-child policy |  | 90.260% | 91.550% | *** |
| N |  | 14844 | 16825 |  |

a: one Yuan is 0.163 U.S. dollar (the average exchange rate as of 2014).

Note: the urban-rural difference test is based on the t-test or the chi-square test when appropriate.

Data source: CLASS 2014

Table 2: Results of the Conditional Fixed-Effect Fractional Logit Model (Adult Children of Surveyed Older Respondents)

|  | preferred caregiver | | | | | | | | preferred listener | | | | | |
| --- | --- | --- | --- | --- | --- | --- | --- | --- | --- | --- | --- | --- | --- | --- |
|  | rural | | | | urban | | | | rural | | | urban | | |
| Economic security | -0.014 | | (0.028) |  | <0.001 | | (0.024) |  | -0.005 | (0.029) |  | 0.016 | (0.025) |  |
| Educational attainment |  | |  |  |  | |  |  |  |  |  |  |  |  |
| (reference=no formal education) |  | |  |  |  | |  |  |  |  |  |  |  |  |
| *junior high school or below* | 0.174 | | (0.069) | * | 0.081 | | (0.080) |  | 0.160 | (0.071) | * | 0.082 | (0.084) |  |
| *senior high school and above* | 0.165 | | (0.077) | * | 0.149 | | (0.081) |  | 0.152 | (0.079) |  | 0.165 | (0.087) |  |
| Job status (being employed) | -0.145 | | (0.043) | *** | -0.007 | | (0.039) |  | -0.153 | (0.045) | *** | -0.021 | (0.040) |  |
| Marital status (being married) | -0.444 | | (0.048) | *** | -0.447 | | (0.042) | *** | -0.391 | (0.050) | *** | -0.396 | (0.043) | *** |
| Children less than 18 | 0.169 | | (0.037) | *** | 0.091 | | (0.033) | ** | 0.176 | (0.038) | *** | 0.064 | (0.034) |  |
| Coresidence | 0.205 | | (0.063) | *** | 0.076 | | (0.052) |  | 0.154 | (0.063) | * | 0.032 | (0.055) |  |
| Apartment owned by parents | 0.123 | | (0.080) |  | 0.093 | | (0.067) |  | 0.088 | (0.083) |  | 0.012 | (0.070) |  |
| Receiving support for grandchildren care | 0.024 | | (0.011) | * | 0.019 | | (0.009) | * | 0.015 | (0.012) |  | 0.016 | (0.010) |  |
| Receiving monetary support | 0.017 | | (0.014) |  | 0.016 | | (0.008) |  | 0.006 | (0.014) |  | 0.014 | (0.009) |  |
| Receiving household chore support | 0.029 | | (0.017) |  | 0.009 | | (0.013) |  | 0.019 | (0.017) |  | 0.014 | (0.014) |  |
| Providing monetary support | 0.030 | | (0.010) | ** | 0.019 | | (0.008) | * | 0.037 | (0.010) | *** | 0.020 | (0.008) | * |
| Providing household chore support | 0.043 | | (0.015) | ** | 0.015 | | (0.013) |  | 0.049 | (0.016) | ** | 0.032 | (0.013) | * |
| Frequency of meeting each other | 0.015 | | (0.017) |  | 0.049 | | (0.015) | *** | 0.029 | (0.018) |  | 0.040 | (0.016) | ** |
| Frequency of calling each other | 0.034 | | (0.011) | ** | 0.022 | | (0.009) | * | 0.046 | (0.012) | *** | 0.022 | (0.009) | * |
| Gender(female) | -0.069 | | (0.036) |  | -0.017 | | (0.031) |  | 0.001 | (0.038) |  | 0.053 | (0.032) |  |
| Birth order (first) | 0.488 | | (0.044) | *** | 0.546 | | (0.040) | *** | 0.563 | (0.045) | *** | 0.606 | (0.041) | *** |
| Birth order (last) | 0.197 | | (0.039) | *** | 0.256 | | (0.033) | *** | 0.201 | (0.041) | *** | 0.258 | (0.035) | *** |
| ID of parents | √ | |  |  | √ | |  |  | √ |  |  | √ |  |  |
| Intercept | -1.327 | | (0.107) | *** | -1.222 | | (0.104) | *** | -1.571 | (0.113) | *** | -1.459 | (0.108) | *** |
| Log Likelihood | -3149.532 | |  | *** | -3181.187 | |  | *** | -3072.592 |  | *** | -3132.241 |  | *** |
| N | 18525 | |  |  | 23498 | |  |  | 18297 |  |  | 23016 |  |  |
| * p<0.05 ** p<0.01 *** p<0.001 (two-tailed test) | | | | | |
| standard errors in parentheses | |
| Data source: CLASS 2014 | |

Table 3: Results for the Interactions between Birth Order and Gender

| Dependent variable | Region | Interaction Terms | |  |  |
| --- | --- | --- | --- | --- | --- |
| preferred caregiver | rural | Birth order (first)×Gender (female) | | 0.116 | (0.073) |
|  |  | Birth order (last)×Gender (female) | | -0.079 | (0.064) |
|  | urban | Birth order (first)×Gender (female) | | -0.047 | (0.069) |
|  |  | Birth order (last)×Gender (female) | | -0.012 | (0.064) |
| preferred listener | rural | Birth order (first)×Gender (female) | | 0.038 | (0.080) |
|  |  | Birth order (last)×Gender (female) | | -0.072 | (0.072) |
|  | urban | Birth order (first)×Gender (female) | | -0.030 | (0.081) |
|  |  | Birth order (last)×Gender (female) | | 0.020 | (0.074) |
| * p<0.05 ** p<0.01 *** p<0.001 (two-tailed test) | | | | |
| standard errors in parentheses | | |
| Data source: CLASS | | |

Table 4: Results of the Conditional Fixed-Effect Fractional Logit Model (Adult Children of Surveyed Older Respondents): Interactions with Region

|  | preferred caregiver | | | preferred listener | | |
| --- | --- | --- | --- | --- | --- | --- |
| Economic security | 0.000 | (0.024) |  | 0.016 | (0.025) |  |
| Educational attainment |  |  |  |  |  |  |
| (reference=no formal education) |  |  |  |  |  |  |
| *junior high school or below* | 0.081 | (0.080) |  | 0.082 | (0.084) |  |
| *senior high school and above* | 0.150 | (0.081) |  | 0.165 | (0.087) |  |
| Job status (being employed) | -0.006 | (0.039) |  | -0.021 | (0.040) |  |
| Marital status (being married) | -0.447 | (0.042) | *** | -0.396 | (0.043) | *** |
| Children less than 18 | 0.091 | (0.033) | ** | 0.064 | (0.034) |  |
| Coresidence | 0.076 | (0.052) |  | 0.032 | (0.055) |  |
| Apartment owned by parents | 0.091 | (0.067) |  | 0.012 | (0.070) |  |
| Receiving support for grandchildren care | 0.019 | (0.009) | * | 0.016 | (0.010) |  |
| Receiving monetary support | 0.016 | (0.008) | * | 0.014 | (0.009) |  |
| Receiving household chore support | 0.009 | (0.013) |  | 0.014 | (0.014) |  |
| Providing monetary support | 0.019 | (0.008) | * | 0.020 | (0.008) | * |
| Providing household chore support | 0.015 | (0.013) |  | 0.032 | (0.013) | * |
| Frequency of meeting each other | 0.049 | (0.015) | *** | 0.040 | (0.016) | ** |
| Frequency of calling each other | 0.022 | (0.009) | * | 0.021 | (0.009) | * |
| Gender(female) | -0.017 | (0.031) |  | 0.053 | (0.032) |  |
| Birth order (first) | 0.546 | (0.040) | *** | 0.606 | (0.041) | *** |
| Birth order (last) | 0.256 | (0.033) | *** | 0.258 | (0.035) | *** |
| ID of parents | √ |  |  | √ |  |  |
| Region(rural) | -0.062 | (0.143) |  | -0.103 | (0.151) |  |
| Economic security ×Region (rural) | -0.016 | (0.036) |  | -0.021 | (0.038) |  |
| Educational attainment (junior high school or below) ×Region (rural) | 0.090 | (0.103) |  | 0.077 | (0.109) |  |
| Educational attainment (senior high school and above) ×Region (rural) | 0.013 | (0.111) |  | -0.013 | (0.117) |  |
| Job status (being employed) ×Region (rural) | -0.139 | (0.059) | * | -0.132 | (0.060) | * |
| Marital status (being married)×Region (rural) | 0.004 | (0.064) |  | 0.006 | (0.066) |  |
| Children less than 18 ×Region (rural) | 0.078 | (0.049) |  | 0.112 | (0.051) | * |
| Coresidence ×Region (rural) | 0.129 | (0.079) |  | 0.123 | (0.082) |  |
| Apartment owned by parents ×Region (rural) | 0.034 | (0.104) |  | 0.076 | (0.108) |  |
| Receiving support for grandchildren care ×Region (rural) | 0.005 | (0.015) |  | -0.001 | (0.015) |  |
| Receiving monetary support ×Region (rural) | 0.000 | (0.016) |  | -0.007 | (0.017) |  |
| Receiving household chore support ×Region (rural) | 0.021 | (0.021) |  | 0.005 | (0.022) |  |
| Providing monetary support ×Region (rural) | 0.011 | (0.012) |  | 0.017 | (0.013) |  |
| Providing household chore support ×Region (rural) | 0.028 | (0.020) |  | 0.017 | (0.021) |  |
| Frequency of meeting each other ×Region (rural) | -0.033 | (0.023) |  | -0.011 | (0.023) |  |
| Frequency of calling each other ×Region (rural) | 0.012 | (0.015) |  | 0.024 | (0.015) |  |
| Gender(female) ×Region (rural) | -0.052 | (0.047) |  | -0.051 | (0.050) |  |
| Birth order (first) ×Region (rural) | -0.058 | (0.059) |  | -0.044 | (0.061) |  |
| Birth order (last) ×Region (rural) | -0.059 | (0.051) |  | -0.057 | (0.053) |  |
| Intercept | -1.241 | (0.103) | *** | -1.462 | (0.107) | *** |
| Log Likelihood | -6336.17 |  | *** | -6210.54 |  | *** |
| N | 42023 |  |  | 41313 |  |  |
